# Supplementary material
Source: PubMed Central journal article supplement (PMC10286807)
Supplement: NIHMS1861240-supplement-1.pdf [file NIHMS1861240-supplement-1.pdf]

**Table S1: Clinical characteristics of melanoma patients (Cohort 1), Related to Figure 1.**

|                                | Total Cohort | Immune Checkpoint Blockade | Targeted Therapy |          |
|--------------------------------|--------------|----------------------------|------------------|----------|
| Number of Patients             | 389          | 251                        | 138              |          |
| Age at Immunotherapy (Average) | 59.6         | 60.9                       | 57.2             | P= 0.019 |
| Gender                         |              |                            |                  |          |
| Male                           | 257 (66%)    | 163 (65%)                  | 94 (68%)         | P=0.527  |
| Female                         | 132 (34%)    | 88 (35%)                   | 44 (32%)         |          |
| ECOG Performance Status        |              |                            |                  | P=0.001  |
| 0-1                            | 359 (92%)    | 240 (96%)                  | 119 (86%)        |          |
| 2+                             | 30 (8%)      | 11 (4%)                    | 19 (14%)         |          |
| Histology                      |              |                            |                  |          |
| Melanoma                       | 389(100%)    | 251 (100%)                 | 138(100%)        | P<0.001  |
| BRAF V600 Mutant               | 233 (43%)    | 95 (38%)                   | 138(100%)        |          |
| Stage at Therapy               |              |                            |                  |          |
| IV                             | 389(100%)    | 251 (100%)                 | 138(100%)        |          |
| Prior Lines of Therapy         |              |                            |                  |          |
| 0                              | 295 (76%)    | 216 (86%)                  | 79 (57%)         | P<0.001  |
| 1+                             | 94 (24%)     | 35 (14%)                   | 59 (43%)         |          |
| Disease Origin                 |              |                            |                  |          |
| Cutaneous                      | 326 (84%)    | 200 (80%)                  | 126 (91%)        | P<0.001  |
| Mucosal                        | 20 (5%)      | 20 (8%)                    | 0 (0%)           |          |
| Ocular                         | 31 (8%)      | 27 (11%)                   | 4 (3%)           |          |
| Unknown                        | 12 (3%)      | 4 (1%)                     | 8 (6%)           |          |
| Therapy                        |              |                            |                  |          |
| Dabrafenib                     | 14 (3%)      |                            | 14 (10%)         |          |
| Trametinib                     | 4 (1%)       |                            | 4 (3%)           |          |
| Vemurafenib                    | 36 (9%)      |                            | 36 (26%)         |          |
| Encorafenib                    | 1 (0%)       |                            | 1 (1%)           |          |
| DTIC                           | 1 (0%)       |                            | 1 (1%)           |          |
| Dabrafenib and Trametinib      | 77 (20%)     |                            | 77 (56%)         |          |
| Vemurafenib and Cobimetinib    | 3 (1%)       |                            | 3 (2%)           |          |
| Encorafenib and Binimetinib    | 2 (1%)       |                            | 2 (1%)           |          |
| Nivolumab                      | 38 (10%)     | 38 (15%)                   |                  |          |
| Pembrolizumab                  | 96 (25%)     | 96 (38%)                   |                  |          |
| Ipilimumab                     | 45 (12%)     | 45 (18%)                   |                  |          |
| Ipilimumab and Nivolumab       | 72 (1%)      | 72 (29%)                   |                  |          |

Abbreviations:

ECOG- Eastern Cooperative Oncology Group

**Table S2: Clinical characteristics of NSCLC patients (Cohort 2), Related to Figure 1.**

|                                        | Total Cohort | Immune Checkpoint Blockade | Chemotherapy |         |
|----------------------------------------|--------------|----------------------------|--------------|---------|
| Number of Patients                     | 375          | 279                        | 96           |         |
| Average Age                            | 66.0         | 66.0                       | 65.9         | P=0.88  |
| Gender                                 |              |                            |              |         |
| Male                                   | 165 (44%)    | 109 (39%)                  | 56 (58%)     | P=0.001 |
| Female                                 | 210 (56%)    | 170 (61%)                  | 40 (42%)     |         |
| ECOG Performance Status                |              |                            |              | P=0.001 |
| 0-1                                    | 301 (80%)    | 213 (76%)                  | 88 (92%)     |         |
| 2+                                     | 74 (20%)     | 66 (24%)                   | 8 (8%)       |         |
| Smoking Status                         |              |                            |              | P=0.159 |
| Never                                  | 50 (13%)     | 37 (13%)                   | 13 (13%)     |         |
| Former                                 | 279 (75%)    | 213 (76%)                  | 66 (69%)     |         |
| Current                                | 46 (12%)     | 29 (11%)                   | 17 (18%)     |         |
| Stage at Therapy                       |              |                            |              |         |
| IV                                     | 375 (100%)   | 279(100%)                  | 96 (100%)    |         |
| Tumor Histology                        |              |                            |              | P=0.003 |
| Adenocarcinoma                         | 282 (75%)    | 201 (72%)                  | 81 (85%)     |         |
| Squamous Cell Carcinoma                | 66 (18%)     | 60 (22%)                   | 6 (6%)       |         |
| Other                                  | 27 (7%)      | 18 (6%)                    | 9 (9%)       |         |
| Prior Lines of Therapy                 |              |                            |              | P<0.001 |
| 0                                      | 174 (46%)    | 109 (39%)                  | 65 (68%)     |         |
| 1                                      | 104 (28%)    | 88 (32%)                   | 16 (17%)     |         |
| 2+                                     | 97 (26%)     | 82 (29%)                   | 15 (15%)     |         |
| Therapy                                |              |                            |              |         |
| Platinum doublet                       | 54 (14%)     |                            | 54 (56%)     |         |
| Gemcitabine                            | 8 (2%)       |                            | 8 (8%)       |         |
| Pemetrexed                             | 12 (3%)      |                            | 12 (13%)     |         |
| Taxane                                 | 5 (1%)       |                            | 5 (5%)       |         |
| Other                                  | 17 (5%)      |                            | 17 (18%)     |         |
| Atezolizumab                           | 47 (13%)     | 47 (17%)                   |              |         |
| Nivolumab                              | 81 (22%)     | 81 (29%)                   |              |         |
| Pembrolizumab                          | 50 (13%)     | 50 (18%)                   |              |         |
| Carboplatin, pemetrexed, pembrolizumab | 82 (22%)     | 82 (29%)                   |              |         |
| Paclitaxel, pemetrexed, pembrolizumab  | 19 (5%)      | 19 (7%)                    |              |         |

Abbreviations:

ECOG- Eastern Cooperative Oncology Group

**Table S3: HPD definitions, Related to Figure 1.**

| <b>Authors</b>         | <b>Cancer Type</b>    | <b>Definition</b>                                                                                            | <b>DOI</b>                                                                                |
|------------------------|-----------------------|--------------------------------------------------------------------------------------------------------------|-------------------------------------------------------------------------------------------|
| Champiat S, et al.     | Multiple Cancer Types | TGR ratio > 2 and PD at 1st assessment                                                                       | <a href="https://doi.org/10.1158/1078-0432.CCR-16-1741">10.1158/1078-0432.CCR-16-1741</a> |
| Ferrara R, et al.      | NSCLC                 | Delta TGR > 50%                                                                                              | <a href="https://doi.org/10.1001/jamaoncol.2018.3676">10.1001/jamaoncol.2018.3676</a>     |
| Kim CG, et al.         | NSCLC                 | PD, TTF < 2 months, TGK ratio >2 and TGR ratio >2                                                            | <a href="https://doi.org/10.1093/annonc/mdz123">10.1093/annonc/mdz123</a>                 |
| Kato S, et al.         | Multiple Cancer Types | TTF < 2 months, >50% RECIST, >2 fold increase in progression pace                                            | <a href="https://doi.org/10.1158/1078-0432.CCR-16-3133">10.1158/1078-0432.CCR-16-3133</a> |
| Saâda-Bouzid E, et al. | Head and Neck Cancer  | TGK ratio > 2                                                                                                | <a href="https://doi.org/10.1093/annonc/mdx178">10.1093/annonc/mdx178</a>                 |
| Kim Y, et al.          | NSCLC                 | TTF < 2 months, >50% volume increase, TGK >2                                                                 | <a href="https://doi.org/10.1016/j.jtho.2019.05.033">10.1016/j.jtho.2019.05.033</a>       |
| Matos I, et al.        | Multiple Cancer Types | PD in < 8 weeks, 1.4x increase from baseline or 1.2x increase from baseline with involvement of 2 new organs | <a href="https://doi.org/10.1158/1078-0432.CCR-19-2226">10.1158/1078-0432.CCR-19-2226</a> |
| Tunali I, et al.       | NSCLC                 | TGR ratio >2, TTF < 2 months, AND PD on 1st scan                                                             | <a href="https://doi.org/10.1016/j.lungcan.2019.01.010">10.1016/j.lungcan.2019.01.010</a> |
| Petrioli R, et al.     | Multiple Cancer Types | TGR ratio > 2                                                                                                | <a href="https://doi.org/10.1097/CAD.0000000000000864">10.1097/CAD.0000000000000864</a>   |

**Abbreviations:**

HPD- Hyperprogressive Disease

NSCLC- Non-small Cell Lung Cancer

PD- Progressive Disease

RECIST- Response Evaluation Criteria In Solid Tumors

TGK- Tumor Growth Kinetics

TGR- Tumor Growth Rate

TTF- Time to Treatment Failure

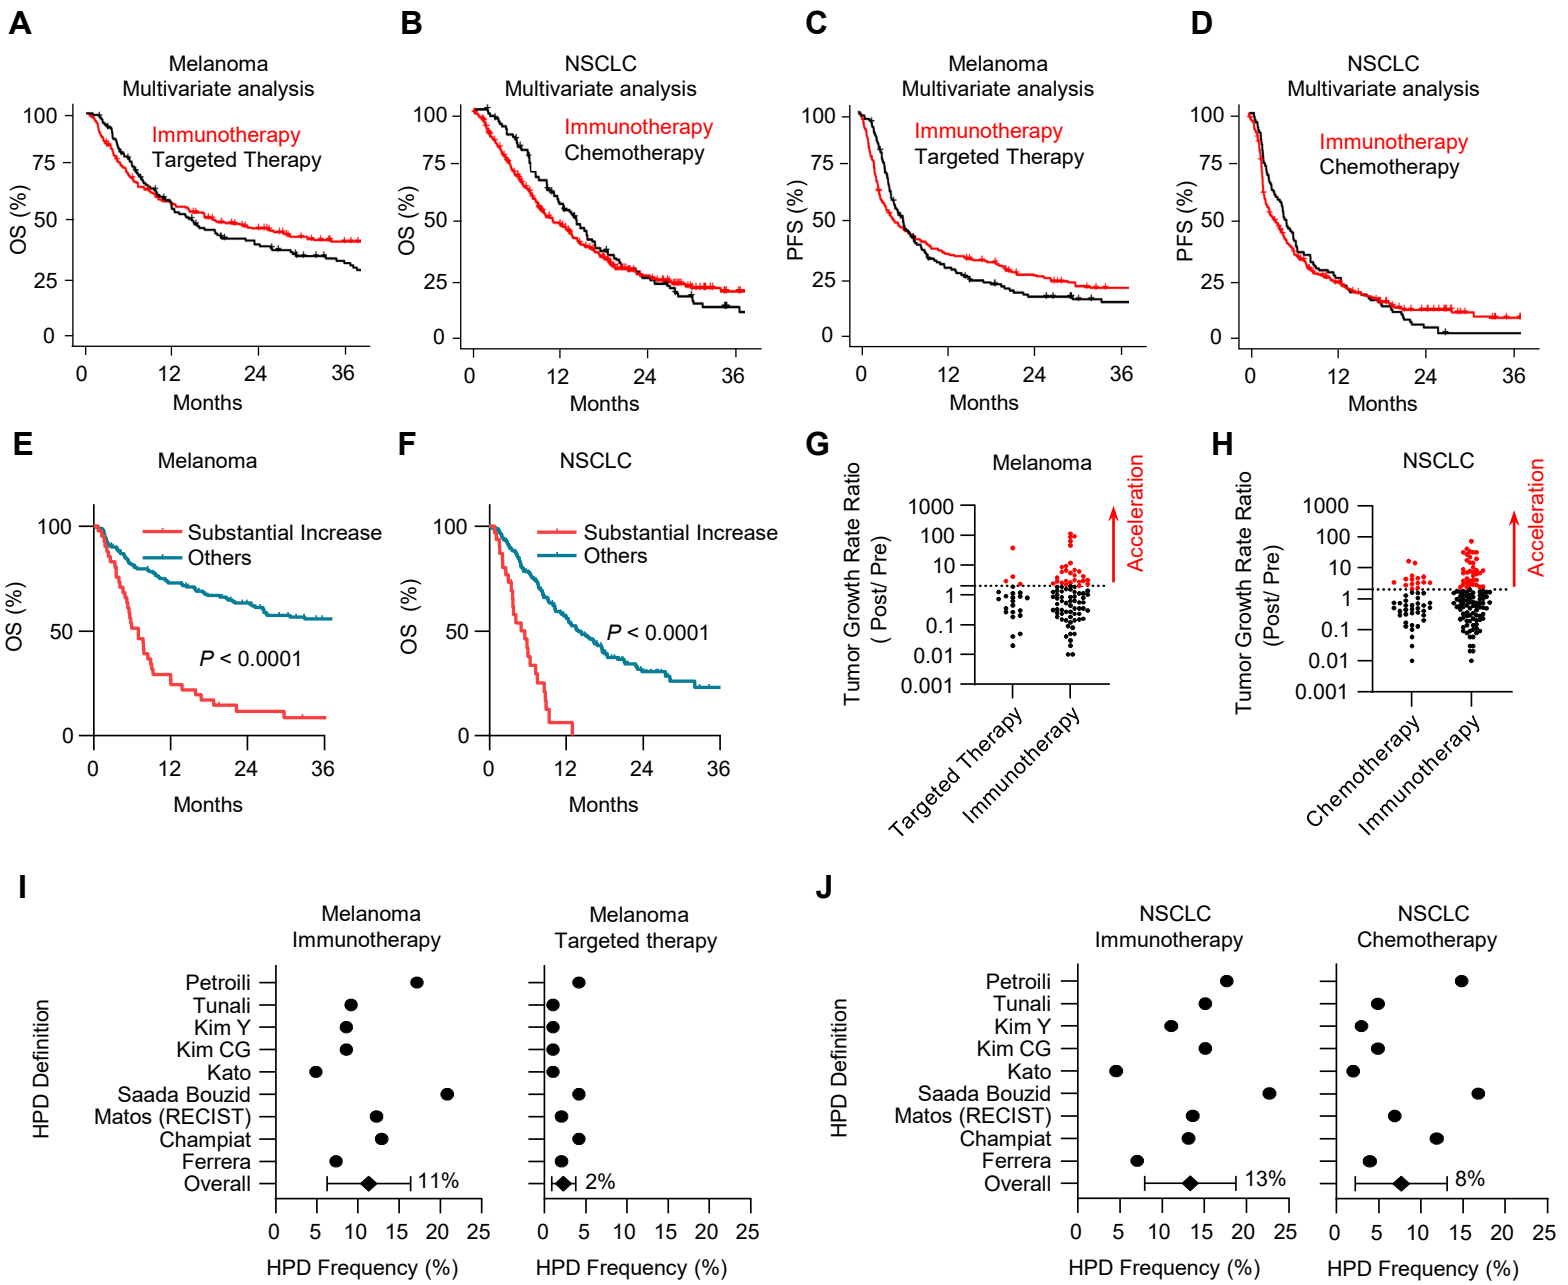

**K**

Melanoma HPD

Melanoma HPD

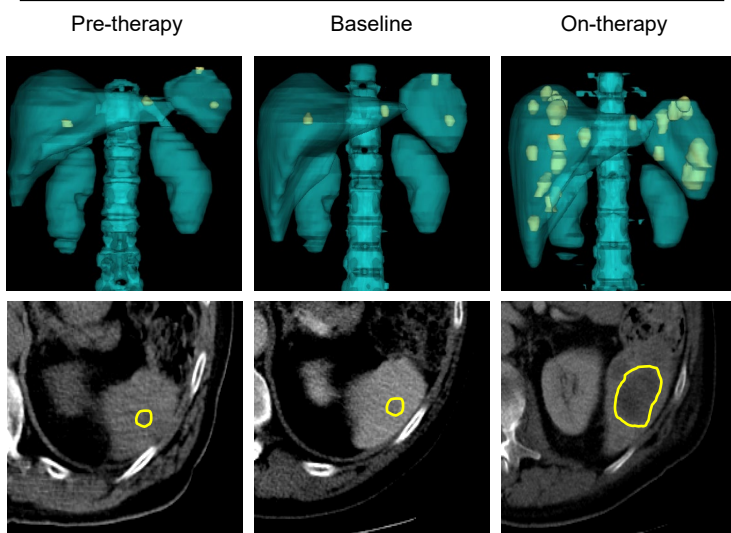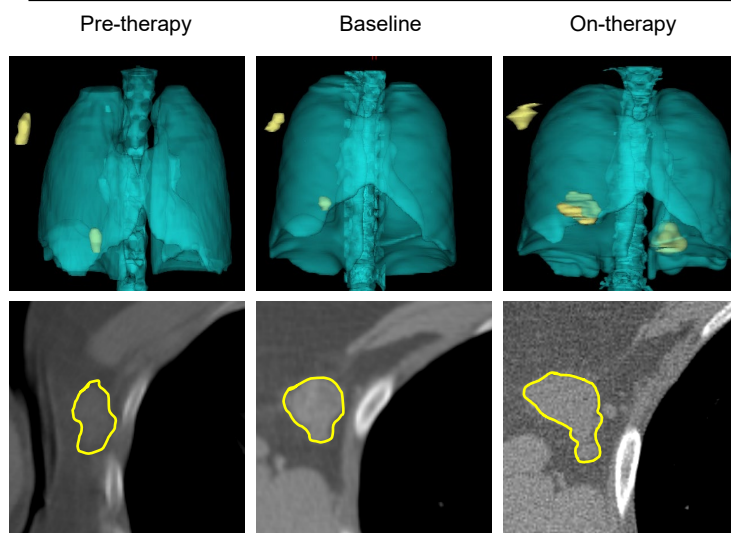**L**

NSCLC HPD

NSCLC HPD

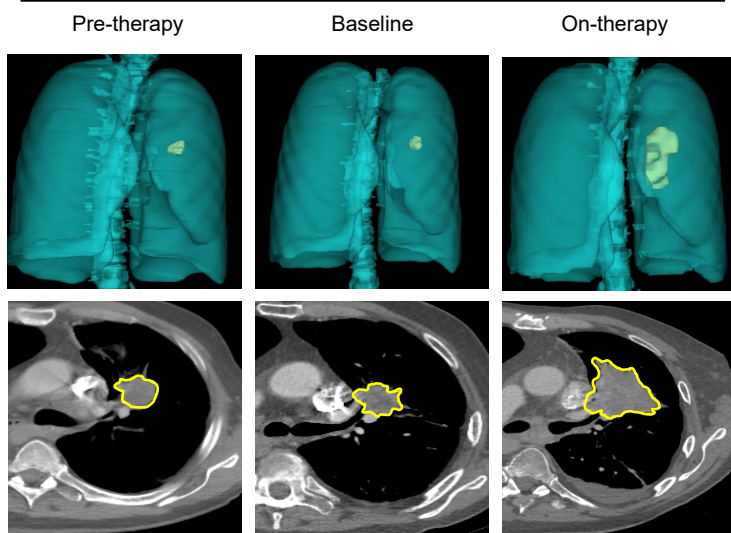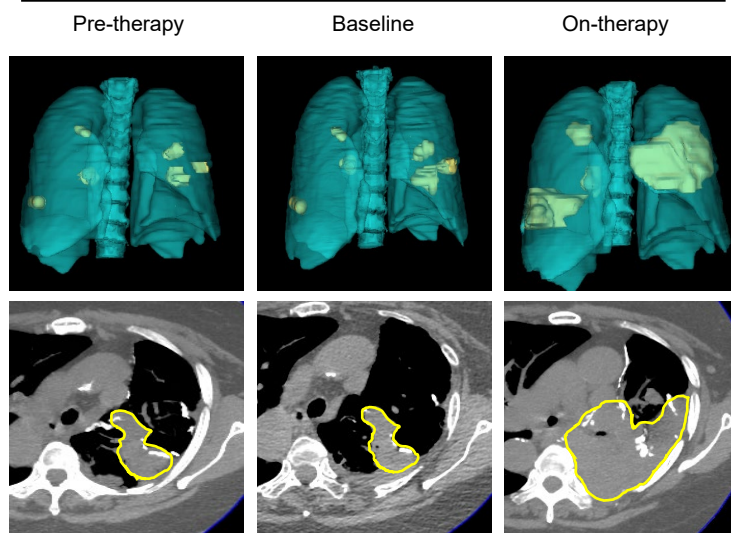

**M**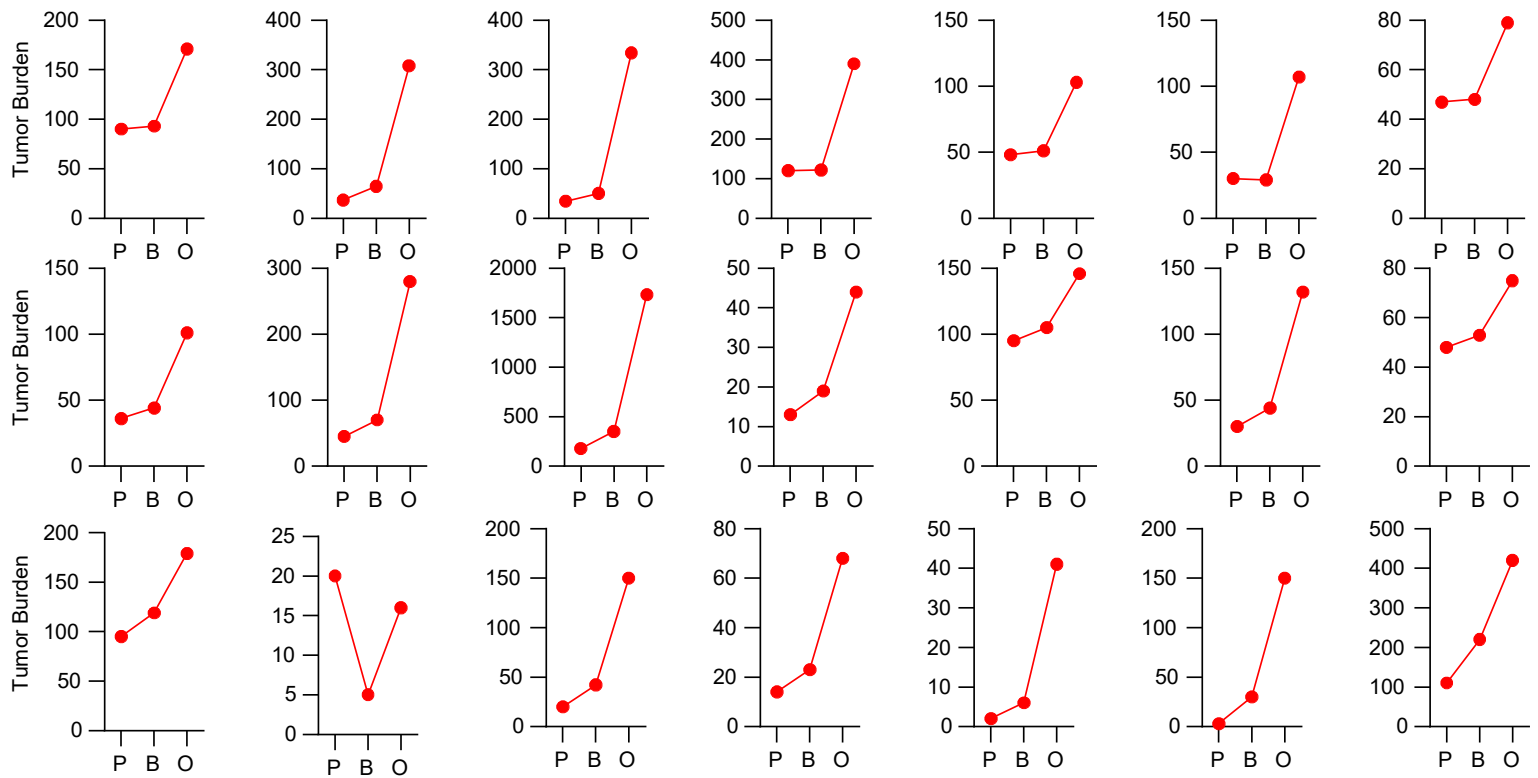**N**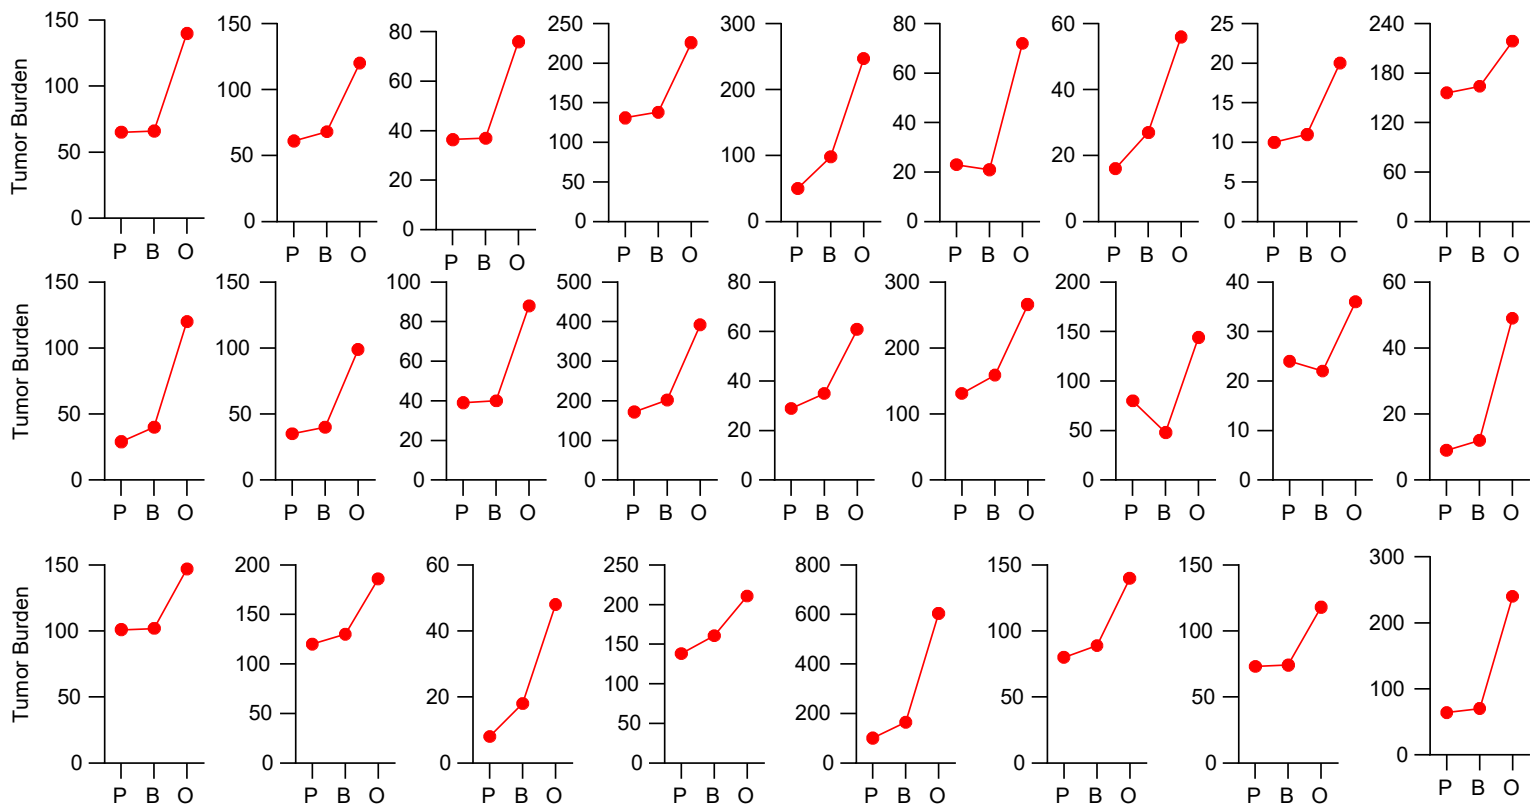

**O**

## Melanoma Immunotherapy Cohort

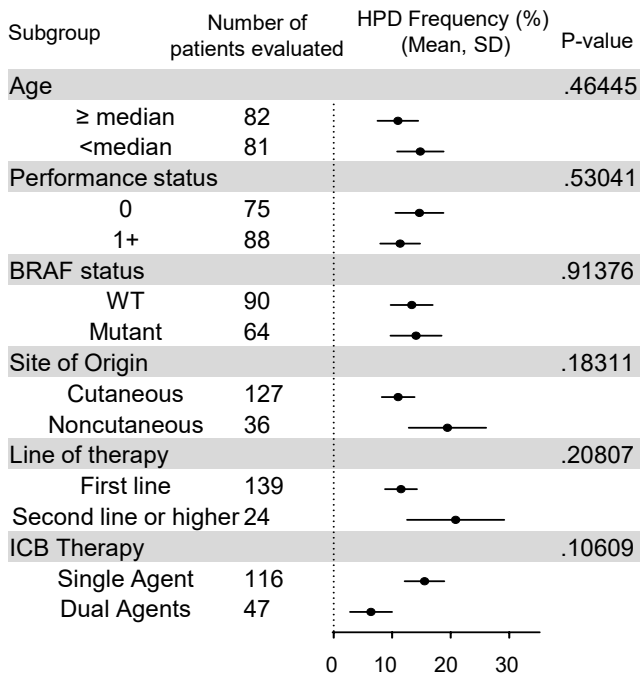**P**

## NSCLC Immunotherapy Cohort

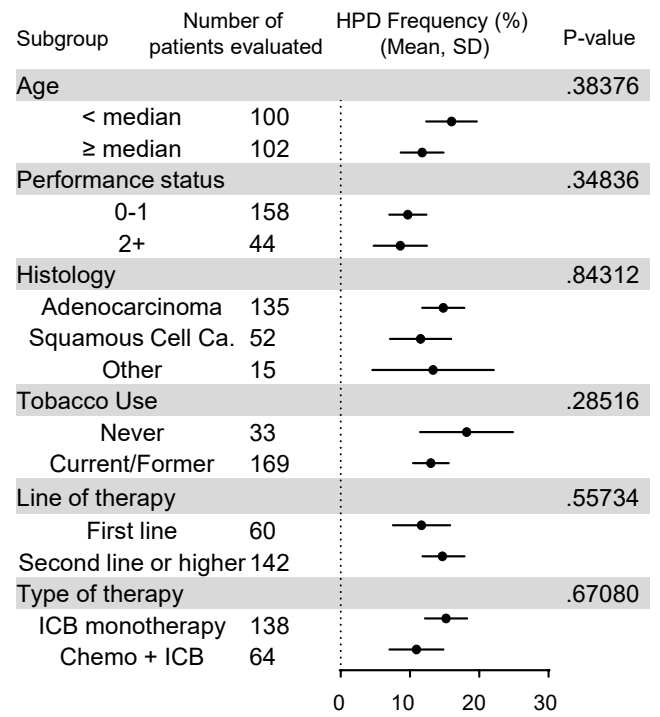**Q****R**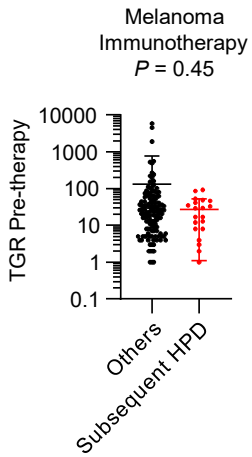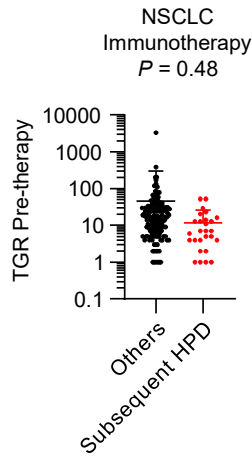

**Figure S1: Rapid cancer progression occurs in a subset of patients during immunotherapy. Related to Figure 1.**

- (A)** Multivariable analysis of overall survival (OS) in patients with melanoma (Cohort 1) stratified by type of therapy. RMST at 3 months, HR = 0.900,  $P < 0.0001$ , Log-rank.
- (B)** Multivariable analysis of OS in patients with NSCLC (Cohort 2) stratified by type of therapy. RMST at 3 months, HR = 0.942,  $P < 0.0001$ , Log-rank.
- (C)** Multivariable analysis of progression-free survival (PFS) in patients with melanoma (Cohort 1) stratified by type of therapy. RMST at 3 months, HR = 0.954,  $P = 0.002$ , Log-rank.
- (D)** Multivariable analysis of PFS in patients with NSCLC (Cohort 2) stratified by type of therapy. RMST at 3 months, HR = 0.896,  $P = 0.001$ , Log-rank.
- (E)** OS of patients with metastatic melanoma treated with ICB (Cohort 1) stratified by radiographic response,  $> 50\%$  response  $n = 41$ ,  $\leq 50\%$  response  $n = 159$ , Hazard ratio (HR) = 0.1431,  $P < 0.0001$  by log-rank test.
- (F)** OS of patients with metastatic NSCLC treated with ICB (Cohort 2) stratified by stratified by radiographic response,  $>50\%$  response  $n = 31$ ;  $\leq 50\%$  response  $n = 181$ , Hazard ratio (HR) = 0.2678,  $P < 0.0001$  by log-rank test.
- (G)** Tumor growth rate (TGR) of patients with melanoma treated with indicated therapy (Cohort 1). Ratio of TGR following therapy to TGR preceding therapy. Cutoff: More than two-fold increase in TGR (red). targeted therapy  $n = 96$ , immunotherapy  $n = 163$ .  $P = 0.00190$  by Chi squared.
- (H)** TGR of patients with NSCLC treated with indicated therapy (Cohort 2). Ratio of TGR following therapy to TGR preceding therapy. Cutoff: More than two-fold increase in TGR (red). chemotherapy  $n = 70$ , immunotherapy  $n = 202$ .  $P = 0.04$  by Chi squared.
- (I)** Frequency of hyperprogression following receipt of immunotherapy (left) or targeted therapy (right) in melanoma patients using indicated criteria from different researchers. paired t test,  $P = 0.001$ . Data are shown as mean  $\pm$  s.d.; immunotherapy  $n = 198$ , targeted therapy  $n = 68$ . Utilizing Champiat et al. definition for HPD: immunotherapy HPD  $n = 25$ ; targeted therapy  $n = 4$ .
- (J)** Frequency of hyperprogression following receipt of immunotherapy (left) or chemotherapy (right) in NSCLC patients using indicated criteria from different researchers. paired t-test,  $P = 0.0001$ . Data are shown as mean  $\pm$  s.d.; immunotherapy  $n = 161$ , chemotherapy  $n = 96$ . Utilizing Champiat et al. definition for HPD: immunotherapy HPD  $n = 21$ ; chemotherapy HPD  $n = 11$ .
- (K-L)** Representative cross-sectional and 3D reconstructed computed tomography (CT) images of two patients with metastatic melanoma (**K**) or NSCLC (**L**) with HPD preceding receipt of immunotherapy (left), at baseline preceding immunotherapy (middle), and at first reassessment following immunotherapy (right).
- (M-N)** Longitudinal tumor burden of individual melanoma (**M**) or NSCLC (**N**) patients with HPD. P, Pre-therapy; B, baseline; O, On-therapy.
- (O-P)** Proportion of melanoma (**O**) and NSCLC (**P**) patients with hyperprogression stratified by indicated clinicopathologic variables. Chi-squared. Data are shown as mean  $\pm$  s.d.
- (Q-R)** Tumor growth rate (TGR) from the period of preceding therapy initiation in patients with melanoma treated with immunotherapy (**Q**) and NSCLC treated with immunotherapy (**R**). Horizontal lines indicate quartiles. Two-tailed t-test.



**Table S4: Clinical characteristics of patients with comprehensive sequencing (Cohort 3), Related to Figure 2.**

|                         | Total Cohort |
|-------------------------|--------------|
| Number of Patients      | 50           |
| Average Age             | 60.6         |
| Gender                  |              |
| Male                    | 24 (48%)     |
| Female                  | 26 (52%)     |
| ECOG Performance Status |              |
| 0-1                     | 42 (84%)     |
| 2+                      | 8 (16%)      |
| Stage at Therapy        |              |
| IV                      | 50 (100%)    |
| Tumor Histology         |              |
| Melanoma                | 13 (26%)     |
| NSCLC                   | 5 (10%)      |
| Urothelial Carcinoma    | 16 (32%)     |
| Sarcoma                 | 7 (14%)      |
| Breast                  | 5 (10%)      |
| Lymphoma                | 4 (8%)       |
| Therapy                 |              |
| Atezolizumab            | 5 (10%)      |
| Ipilimumab              | 2 (4%)       |
| Nivolumab               | 8 (16%)      |
| Pembrolizumab           | 32 (64%)     |
| Combination             | 3 (6%)       |

Abbreviations:

ECOG- Eastern Cooperative Oncology Group

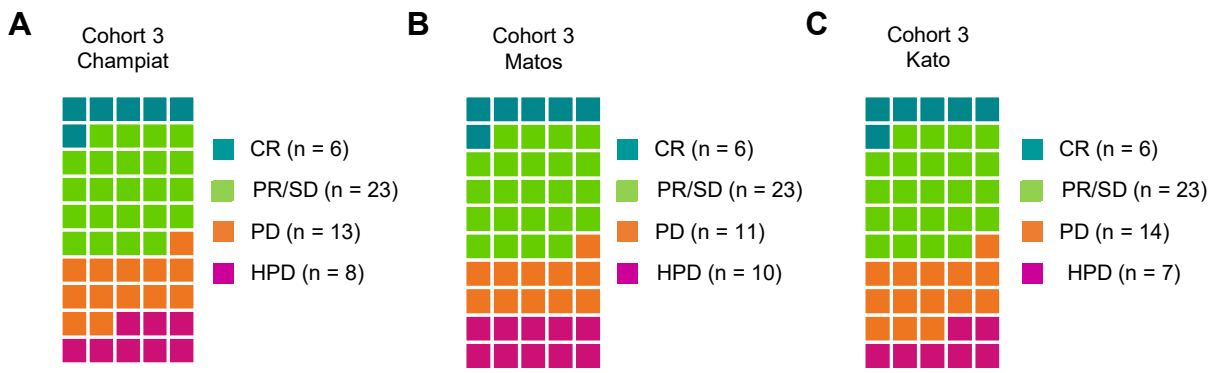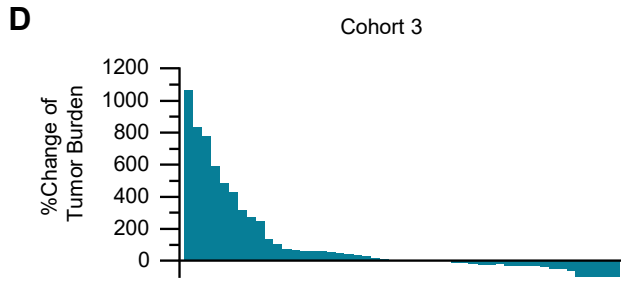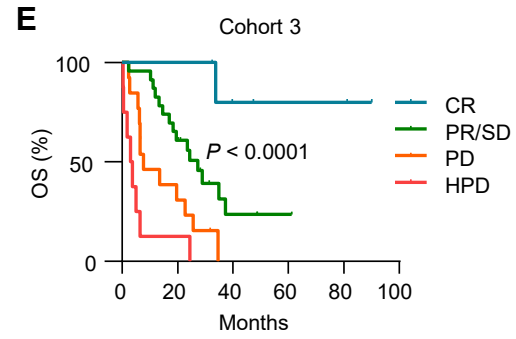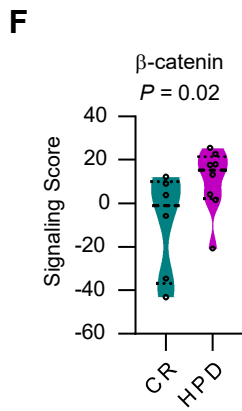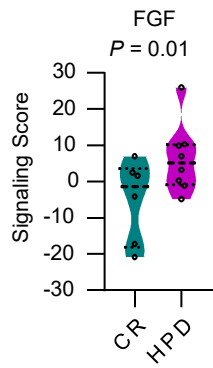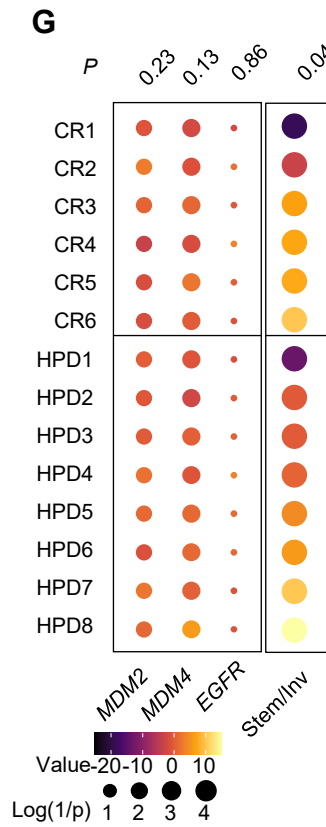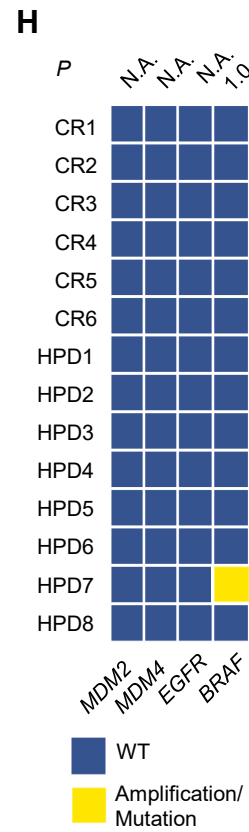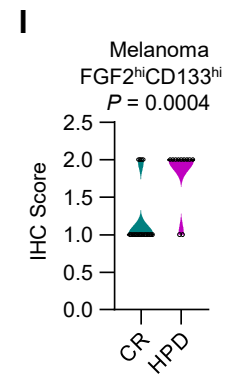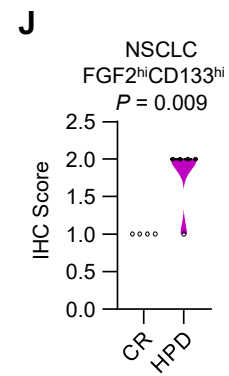

**Figure S2: Immunogenic and oncogenic pathways correlate in patients with HPD. Related to Figure 2.**

**(A-C)** Best radiographic responses in Cohort 3 based on indicated definitions depicted in a tile diagram. 1 tile represents 1 patient. CR, complete response; PR/SD, partial response/stable disease; PD, progressive disease; HPD, hyperprogressive disease. HPD definition criteria were based on the reports by Drs. Champiat, Matos, or Kato.

**(D)** Waterfall plot showing change of tumoral burden from initiation of therapy to first surveillance imaging (Cohort 3), Data are shown as percentage change. n = 50.

**(E)** Overall survival in metastatic patients in Cohort 3 stratified by best radiographic response. HPD definition criteria were based on the report by Dr. Champiat. Log-rank test.

**(F)** Violin plots displaying  $\beta$ -catenin and FGF signaling scores in Cohort 3 patients stratified by response to immunotherapy. CR n = 6, HPD n = 8. P-values were generated from multivariate mixed effect linear models controlling for biopsy site (fixed effect) and disease type (random effect).

**(G)** Heat map showing expression levels for *MDM2*, *MDM4*, *EGFR* and stemness and invasiveness gene signature in HPD and CR patients. P-values were generated from multivariate mixed effect linear models controlling for biopsy site (fixed effect) and disease type (random effect).

**(H)** Tile diagram showed the genetic amplification or mutation of the indicated genes in Cohort 3 patients. Fisher's exact test.

**(I-J)** IHC scores of FGF2<sup>hi</sup>CD133<sup>hi</sup> tumor cells in melanoma **(I)** or NSCLC **(J)** patients with CR or HPD. Chi-square test.

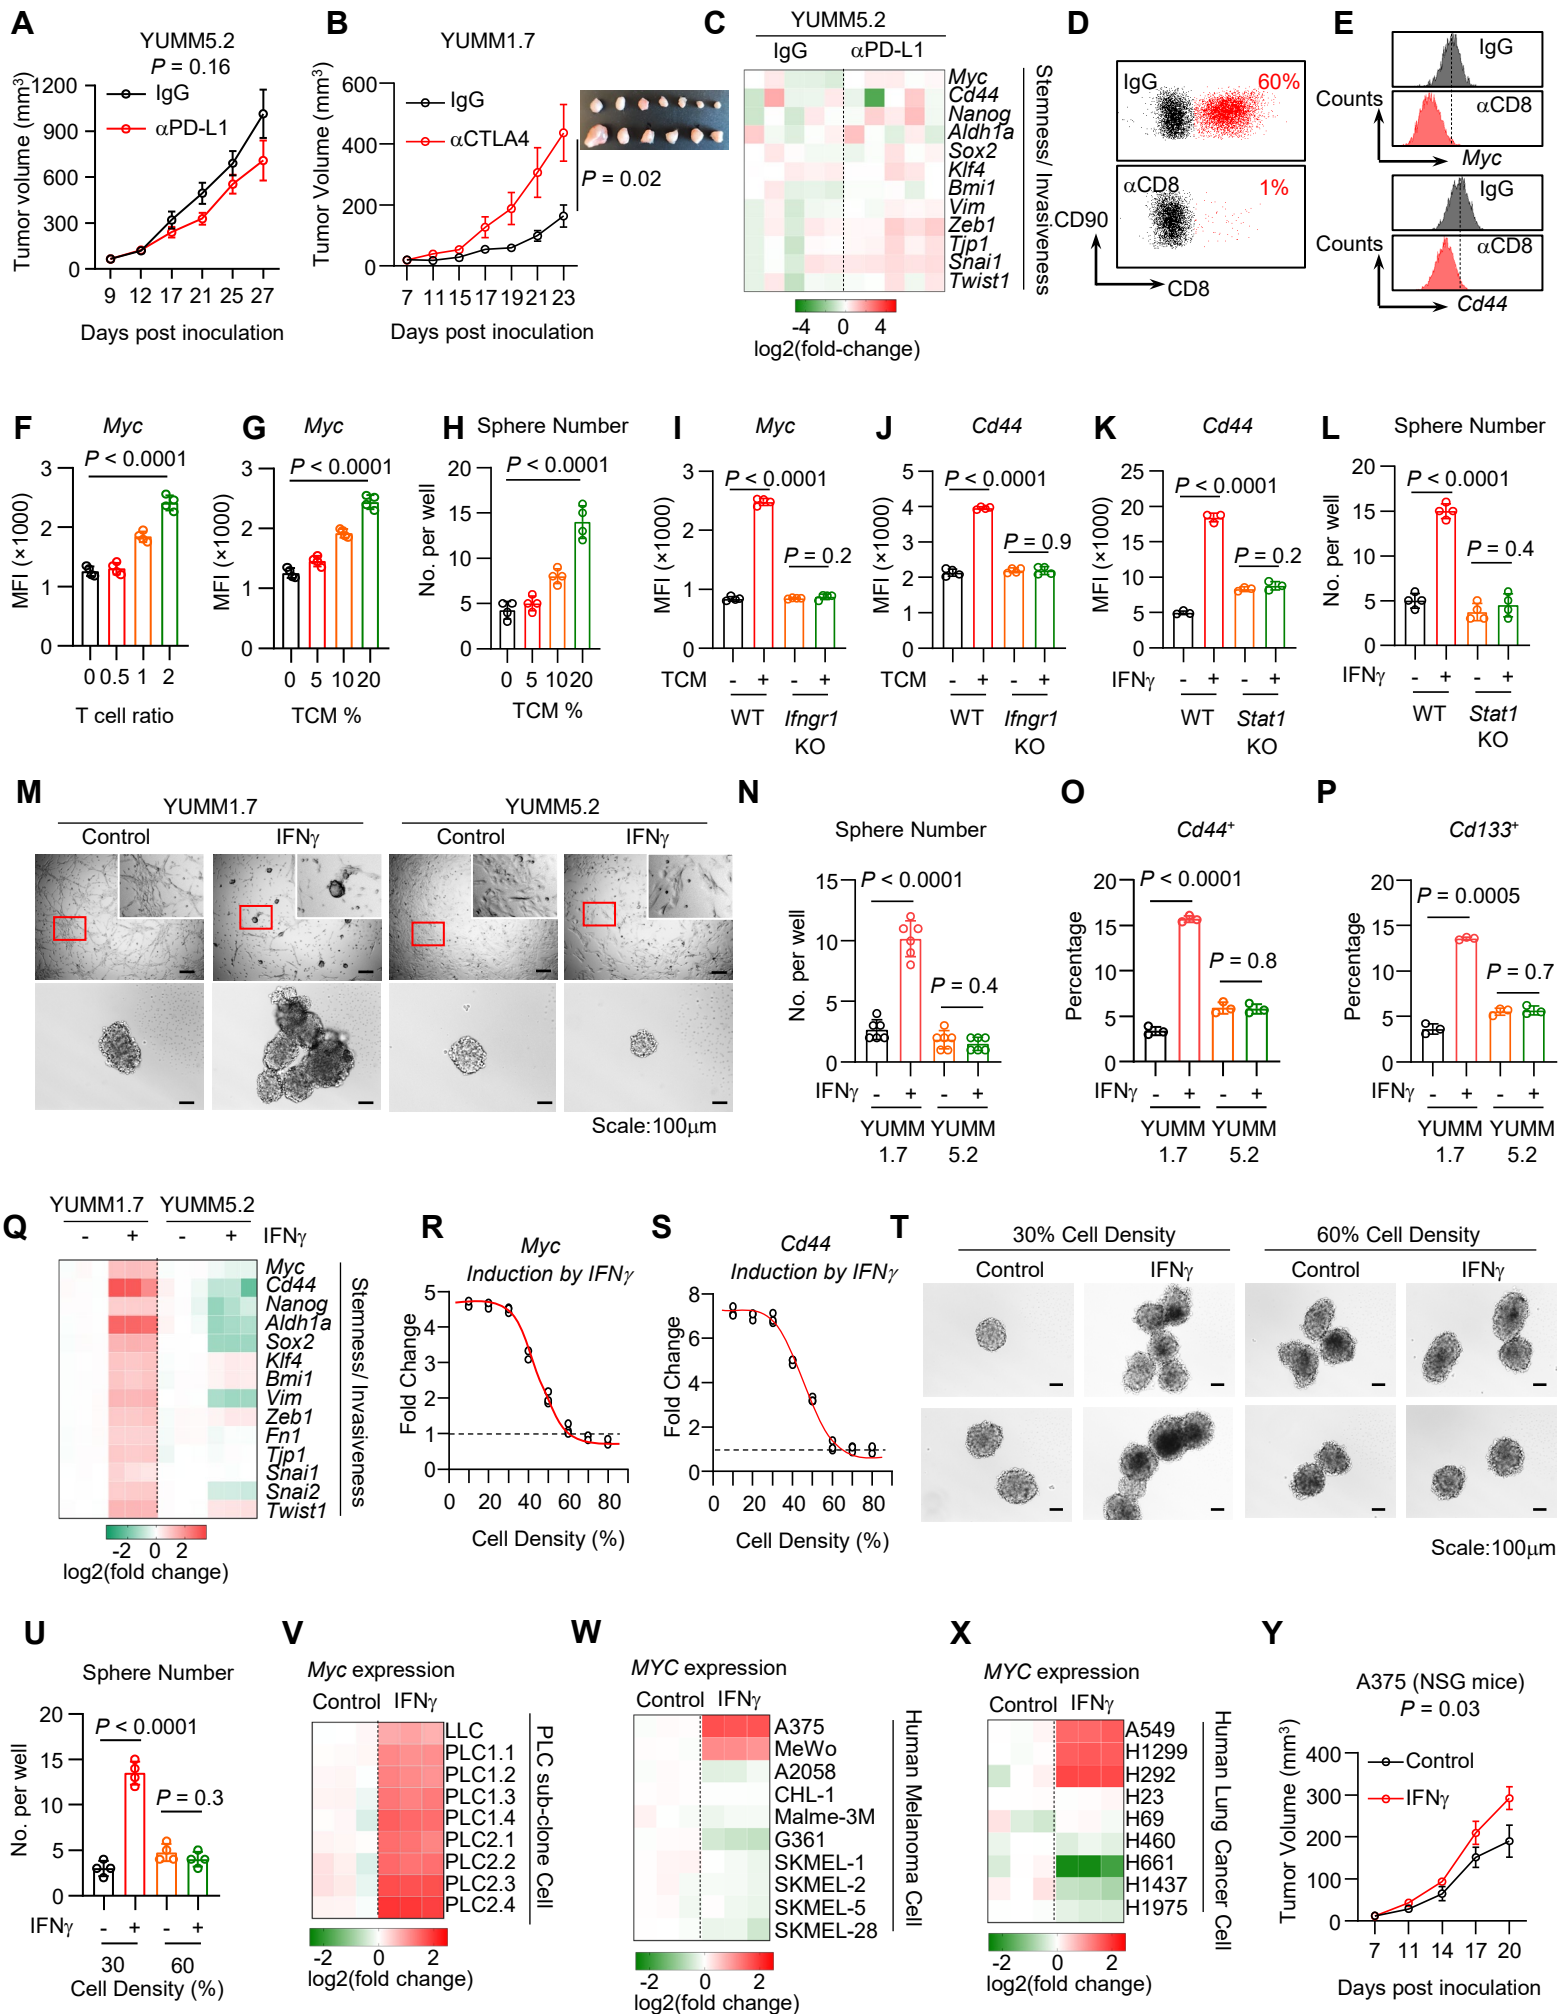

**Figure S3: CD8<sup>+</sup> T cells drive cancer hyperprogression via IFN $\gamma$ . Related to Figure 3.**

**(A)** YUMM5.2 tumor bearing C57BL/6 mice were treated with control (IgG) or PD-L1 antibody. Tumor growth curves were plotted. Data are shown as mean  $\pm$  s.d., n = 7 (IgG) or 5 ( $\alpha$ PD-L1). Two-tailed t-test.

**(B)** YUMM1.7 tumor bearing C57BL/6 mice were treated with control (IgG) or CTLA4 antibody. Tumor growth curves were plotted. Data are shown as mean  $\pm$  s.d., n = 7 (IgG) or 6 ( $\alpha$ CTLA4). Two-tailed t-test.

**(C)** YUMM5.2 tumor bearing C57BL/6 mice were treated with control (IgG) or PD-L1 antibody. On 16<sup>th</sup> day after tumor inoculation, the indicated gene expression in tumors was determined by qPCR. n = 5 tumors.

**(D-E)** YUMM1.7 tumor bearing C57BL/6 mice were treated with control (IgG) or CD8 antibody. Tumor infiltrating CD8<sup>+</sup> T cells **(D)** and *Myc* (upper) or *Cd44* (lower) expression in CD45<sup>-</sup> tumor cells **(E)** were determined by FACS.

**(F-G)** YUMM1.7 cells were cultured with indicated ratio of T cells **(F)** or proportion of T cell conditioned medium (TCM) **(G)** for 48 hours. *Myc* expression (MFI) was determined by FACS analysis in CD45<sup>-</sup>CD90<sup>-</sup> tumor cells. Data are shown as mean  $\pm$  s.d., n = 4. One-way ANOVA test.

**(H)** YUMM1.7 cells were cultured with indicated proportion of T cell conditioned medium (TCM) for 48 hours and transferred into 3D-sphere cultures. Tumor spheres were recorded 7 days after 3D-sphere culture. Data are shown as mean  $\pm$  s.d., n = 4. One-way ANOVA test.

**(I-J)** WT or *Ifngr1* KO YUMM1.7 cells were cultured with 20% TCM for 48 hours. Tumor intracellular *Myc* **(I)** and surface *Cd44* **(J)** expression was determined by FACS. Data are shown as mean  $\pm$  s.d., n = 4. Two-tailed t-test.

**(K-L)** WT or *Stat1* KO YUMM1.7 cells were treated with IFN $\gamma$ . Surface expression of *Cd44* was determined by FACS 48 hours after treatment **(K)**. Tumor spheres were counted on day 7 after 3D-sphere culture **(L)**. Data are mean  $\pm$  s.d., n = 3 **(K)**, n = 4 **(L)**. Two-tailed t-test.

**(M-N)** YUMM1.7 and YUMM5.2 cells were treated with IFN $\gamma$ . Tumor cell morphology in 2D cell culture (upper) or 3D cell culture (lower) was captured after 48 hours treatment **(M)**. Tumor spheres were quantified on day 7. Data are shown as mean  $\pm$  s.d., n = 6. Two-tailed t-test **(N)**.

**(O-P)** YUMM1.7 and YUMM5.2 cells were treated with IFN $\gamma$  for 48 hours, surface expression of *Cd44* **(O)** or *Cd133* **(P)** were determined by FACS. Data are shown as mean  $\pm$  s.d., n = 3. Two-tailed t-test.

**(Q)** YUMM1.7 and YUMM5.2 cells were treated with IFN $\gamma$  for 48 hours. The indicated gene expression was determined by qPCR. n = 3.

**(R-S)** Confluent YUMM1.7 cells were trypsinized, counted, seeded at indicated density, and treated with IFN $\gamma$  for 36 hours. RNA levels of *Myc* **(R)** and *Cd44* **(S)** were determined by qPCR. n = 3.

**(T-U)** YUMM1.7 cells were seeded at 30% or 60% density and treated with IFN $\gamma$  for 48 hours, followed by 3D-sphere culture. Tumor spheres representative images **(T)** or quantitation **(U)** at day 7 are shown. Data are mean  $\pm$  s.d., n = 4, Two-tailed t-test.

**(V)** LLC or PLC cells were treated with IFN $\gamma$  for 24 hours. *Myc* expression was determined by real-time qRT-PCR. Data are shown as mean  $\pm$  s.d., n = 3. P value by two-tailed t-test.

**(W-X)** Human melanoma cell lines **(W)** and human lung cancer cell lines **(X)** were treated with IFN $\gamma$  for 48 hours. *MYC* expression was determined by qPCR. n = 3.

**(Y)** A375 tumor-bearing NSG mice were treated with recombinant human IFN $\gamma$ . Tumor growth curves were plotted. n = 5 (control). n = 6 (IFN $\gamma$ ). Data are shown as mean  $\pm$  s.d., n = 5. Two-tailed t-test.

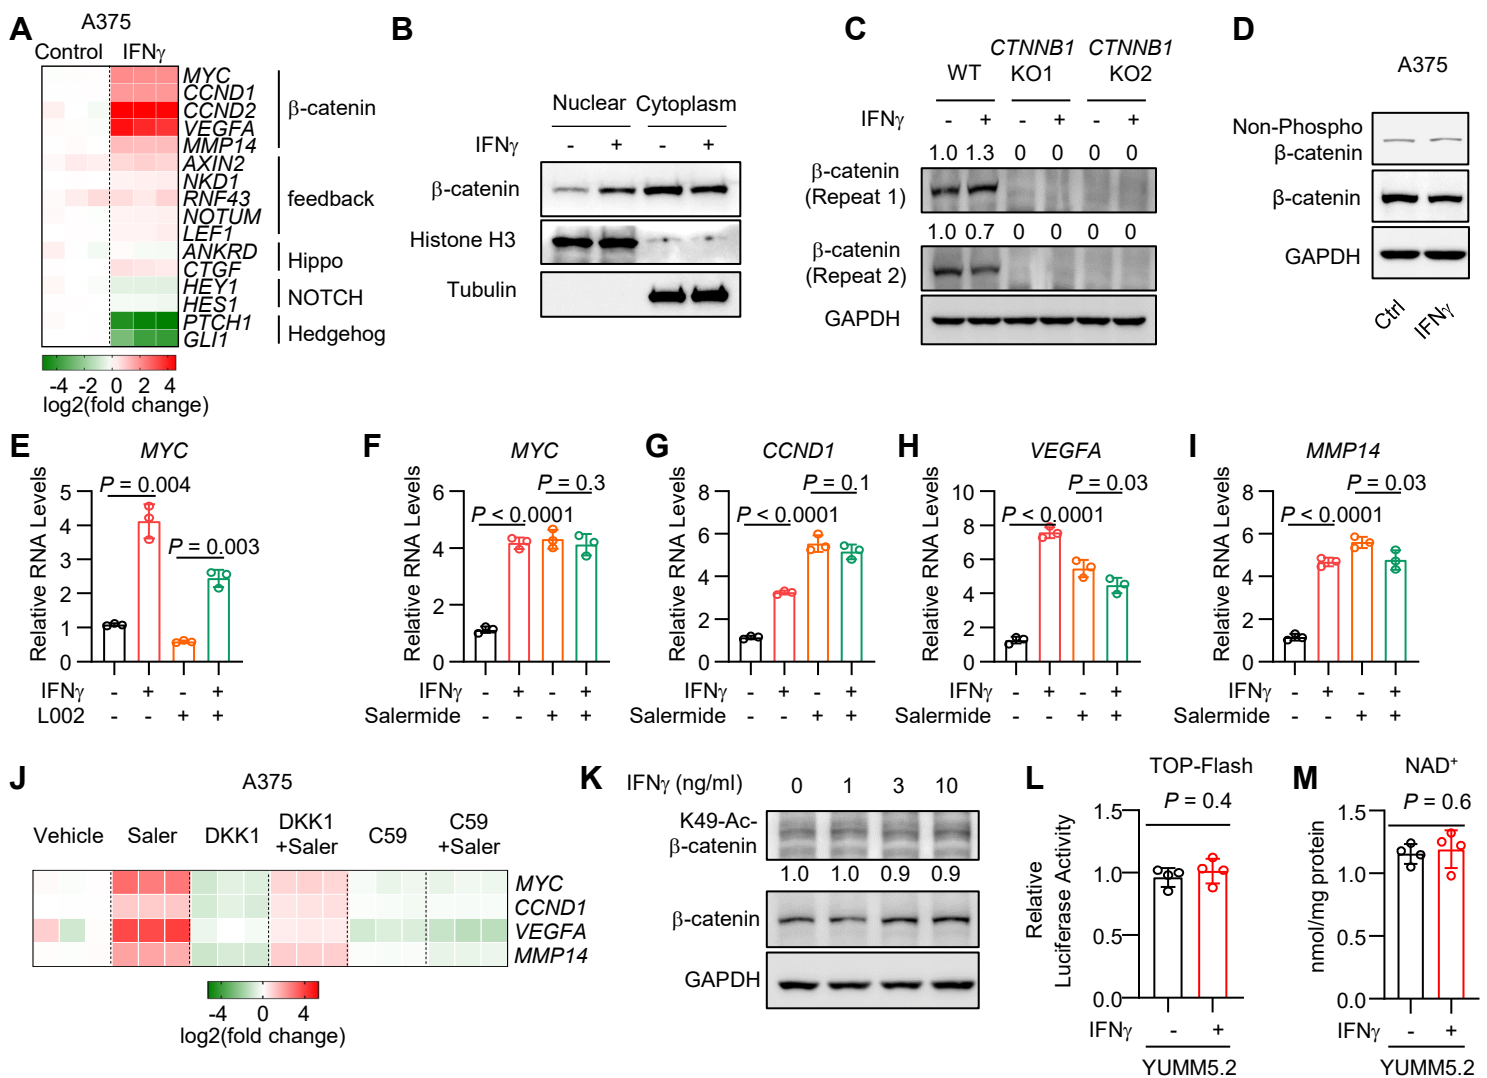

**Figure S4: IFN $\gamma$  reduces NAD<sup>+</sup> to activate  $\beta$ -catenin acetylation. Related to Figure 4.**

**(A-B)** A375 cells were treated with IFN $\gamma$  for 36 hours. Indicated transcripts were determined by qRT-PCR.  $n = 3$  (A). Indicated proteins were determined in the nuclear or cytoplasmic fractions, respectively. 1 of 2 blots shown (B).

**(C)** Wild type (WT) and *CTNNB1* KO A375 cells were treated with IFN $\gamma$  for 24 hours. Protein levels of  $\beta$ -catenin (2 repeats) and GAPDH were determined by Western blotting. 1 of 2 Western blots shown.

**(D)** A375 cells were treated with IFN $\gamma$  for 24 hours, total or non-phosphorylated  $\beta$ -catenin proteins were determined by Western blot. 1 of 2 Western blots shown.

**(E-I)** A375 cells were treated with IFN $\gamma$ , in the presence of L002 (E) and Salermide (F-I), for 24 hours.  $\beta$ -catenin signaling gene transcripts were determined by qRT-PCR. Data are shown as mean  $\pm$  s.d.,  $n = 3$ . Two-tailed t-test.

**(J)** A375 cells were treated with Salermide (Saler) and DKK1 or Wnt-C59 (C59) for 24 hours. The indicated gene expression was determined by qPCR.  $n = 3$ .

**(K)** A375 cells were treated with IFN $\gamma$  for 24 hours. Acetylated- $\beta$ -catenin (K49) was determined by Western blotting. Quantification is indicated. 1 of 3 Western blots shown.

**(L)** TOP-Flash carrying YUMM5.2 cells were treated with IFN $\gamma$  for 48 hours. Relative luciferase activity was determined. Data are shown as mean  $\pm$  s.d.,  $n = 4$ . Two-tailed t-test.

**(M)** YUMM5.2 cells were treated with IFN $\gamma$  for 24 hours. Intracellular NAD<sup>+</sup> levels were determined by kit. Data are shown as mean  $\pm$  s.d.,  $n = 4$ . Two-tailed t-test.

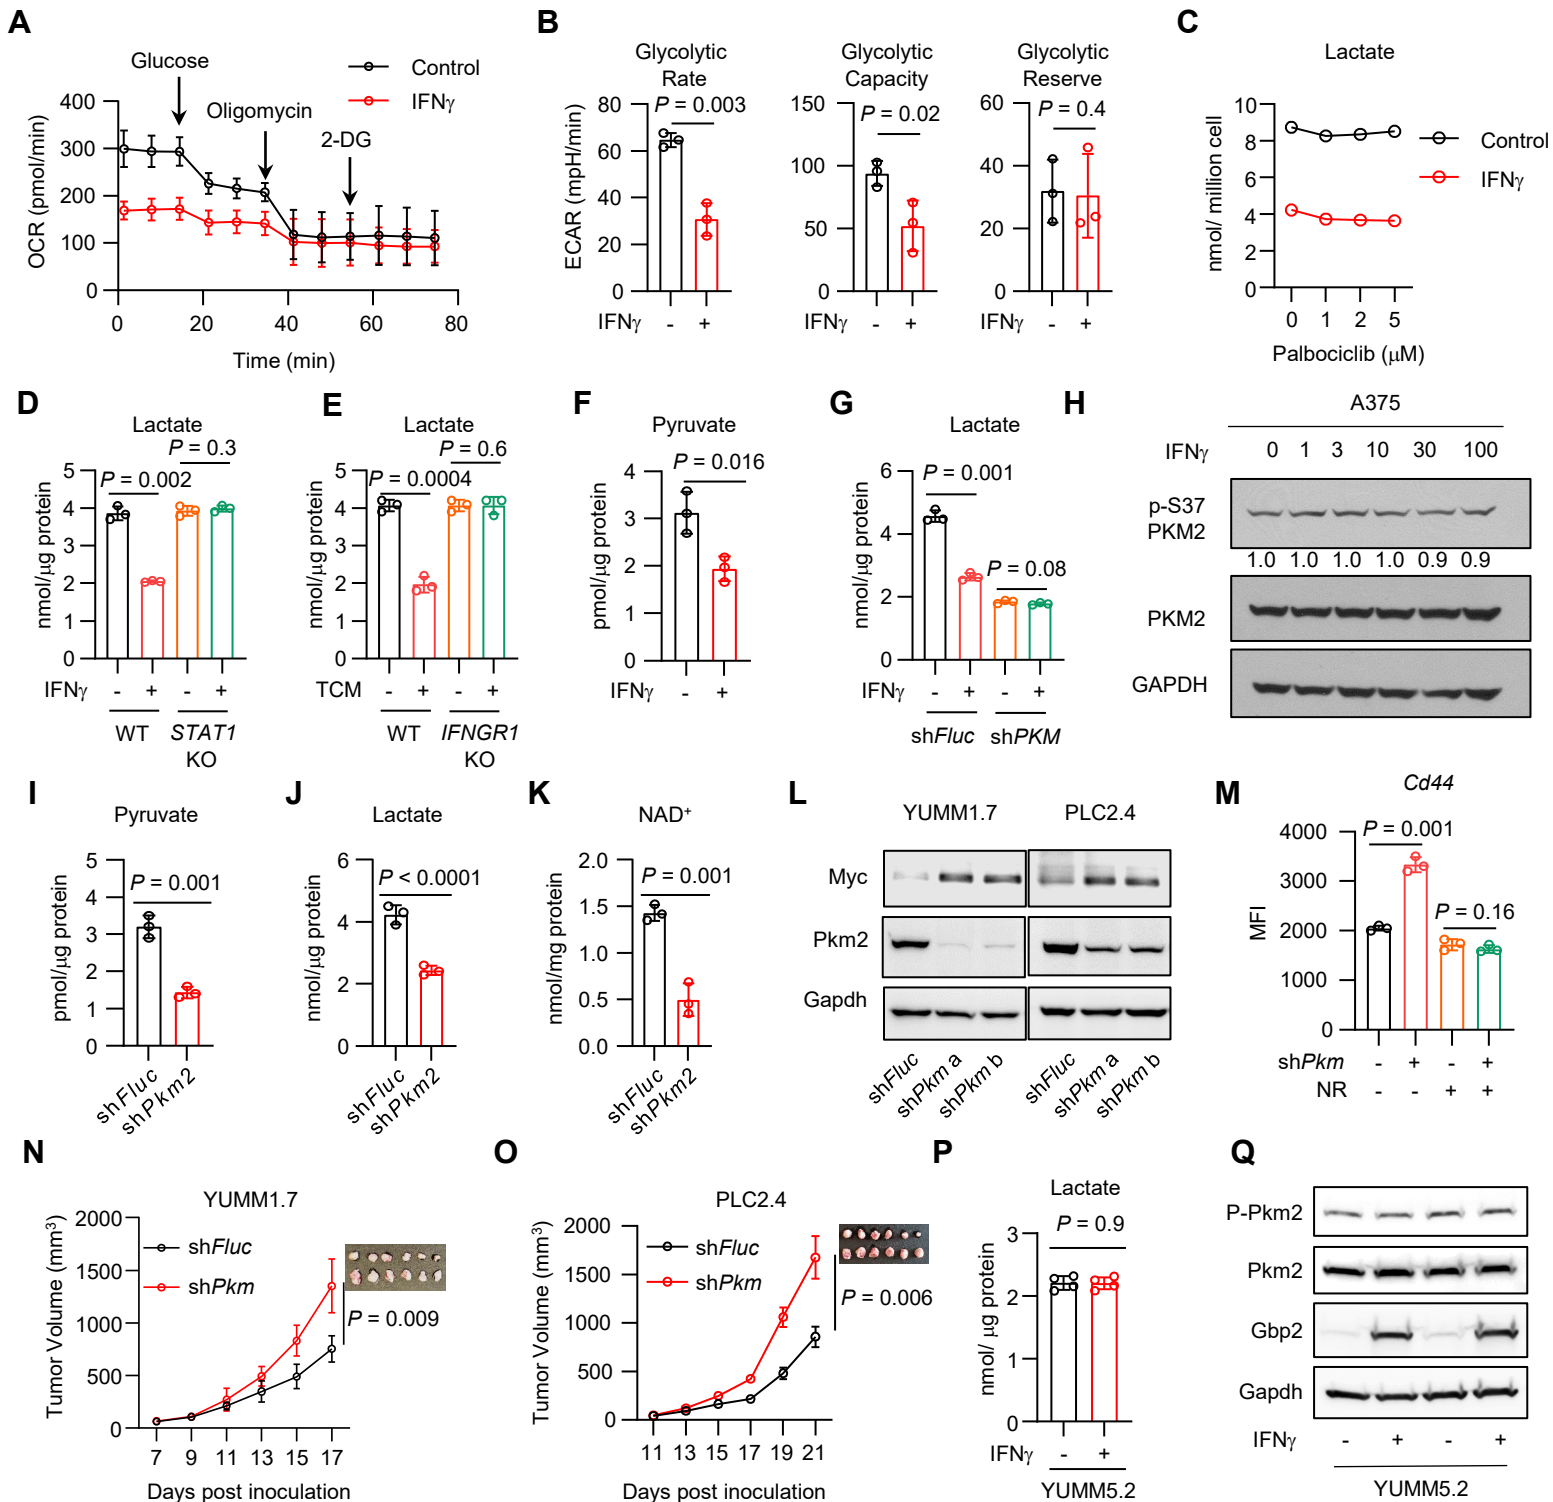

**Figure S5: IFN $\gamma$  regulates PKM2 phosphorylation to alter NAD<sup>+</sup>/  $\beta$ -catenin signaling. Related to Figure 5.**

**(A)** A375 cells were treated with IFN $\gamma$  for 24 hours. Seahorse analysis showing the oxygen consumption rate (OCR) in control cells and IFN $\gamma$ -treated cells in the presence of glucose, oligomycin or 2-DG. Data are shown as mean  $\pm$  s.d., n = 3.

**(B)** Seahorse analysis showing glycolytic rate, glycolytic capacity, and glycolytic reserve in control cells or IFN $\gamma$ -treated A375 cells. Data are shown as mean  $\pm$  s.d., n = 3, P value by two-tailed t-test.

**(C)** A375 cells were treated with IFN $\gamma$  and Palbociclib for 24 hours. Lactate production was determined and normalized with cell numbers. n = 3.

**(D)** WT or *STAT1* A375 KO cells were treated with IFN $\gamma$  for 48 hours. Lactate production was determined by quantitation kit. Data are shown as mean  $\pm$  s.d., n = 3, P value by two-tailed t-test.

**(E)** WT or *IFNGR1* KO A375 cells were treated with T cell conditioned medium (TCM) for 48 hours. Lactate production quantified by kit. Data are shown as mean  $\pm$  s.d., n = 3. Two-tailed t-test.

**(F)** Pyruvate levels were detected in A375 cells treated with medium or IFN $\gamma$ . Data are shown as mean  $\pm$  s.d., n = 3. Two-tailed t-test.

**(G)** Control (*shFluc*) or *PKM2* knock down (*shPKM2*) A375 cells were treated with IFN $\gamma$  for 24 hours. Lactate production quantified by kit. Data are shown as mean  $\pm$  s.d., n = 3. Two-tailed t-test.

**(H)** A375 cells were treated with IFN $\gamma$ . Phosphorylated (S37) and total protein levels of PKM2 were detected by Western blot. Quantification is indicated. 1 of 2 Western blots shown.

**(I-K)** Pyruvate (**I**), Lactate (**J**), and NAD<sup>+</sup> (**K**) levels in YUMM1.7 *shFluc* and *shPkm2* cells were quantified by kits. Data are shown as mean  $\pm$  s.d., n = 3. Two-tailed t-test.

**(L)** Myc and Pkm2 proteins were detected by Western blot in *shFluc* and *shPkm2* YUMM1.7 cells, and PLC2.4 cells. 1 of 2 Western blots shown.

**(M)** *shFluc* or *shPkm2* YUMM1.7 cells were treated with nicotinamide riboside (NR) for 48 hours. Surface expression of *Cd44* was determined by FACS. Data are shown as mean  $\pm$  s.d., n = 3. Two-tailed t-test.

**(N-O)** Tumor growth curves for *shFluc* and *shPkm2* YUMM1.7 (**N**) or PLC2.4 (**O**) cells. Data are shown as mean  $\pm$  s.d., n = 6. Two-tailed t-test.

**(P-Q)** YUMM5.2 cells were treated with IFN $\gamma$  for 24 hours. Lactate production (**P**) and Pkm2 phosphorylation (**Q**) was determined by kit and Western blot, respectively. IFN $\gamma$ -responsive Gbp2 protein was utilized as a positive control. Data are shown as mean  $\pm$  s.d., n = 4. Two-tailed t-test.



**Table S5: FGF/ FGFR family members expression upon IFN $\gamma$  treatment (RNAseq datasets from GSE99299), Related to Figure 6.**

| GENE ID | A375 (RPKM) |     |              |      | Gene ID | B16 (RPKM) |    |              |    |
|---------|-------------|-----|--------------|------|---------|------------|----|--------------|----|
|         | Ctrl        |     | IFN $\gamma$ |      |         | Ctrl       |    | IFN $\gamma$ |    |
| FGF1    | 16          | 13  | 22           | 23   | Fgf1    | 32         | 42 | 24           | 25 |
| FGF2    | 418         | 370 | 1170         | 1171 | Fgf2    | 0          | 0  | 1            | 0  |
| FGF3    | 0           | 0   | 0            | 0    | Fgf3    | 0          | 0  | 0            | 0  |
| FGF4    | 0           | 0   | 0            | 0    | Fgf4    | 0          | 0  | 0            | 0  |
| FGF5    | 95          | 110 | 38           | 38   | Fgf5    | 0          | 0  | 0            | 0  |
| FGF6    | 0           | 0   | 0            | 0    | Fgf6    | 0          | 0  | 0            | 0  |
| FGF7    | 3           | 0   | 0            | 0    | Fgf7    | 2          | 2  | 3            | 4  |
| FGF8    | 0           | 0   | 0            | 0    | Fgf8    | 3          | 1  | 0            | 0  |
| FGF9    | 0           | 0   | 1            | 0    | Fgf9    | 2          | 0  | 1            | 0  |
| FGF10   | 0           | 0   | 0            | 0    | Fgf10   | 0          | 0  | 0            | 0  |
| FGF11   | 12          | 24  | 15           | 22   | Fgf11   | 0          | 0  | 0            | 0  |
| FGF12   | 36          | 40  | 37           | 30   | Fgf12   | 0          | 0  | 0            | 0  |
| FGF13   | 73          | 74  | 76           | 40   | Fgf13   | 0          | 0  | 0            | 0  |
| FGF14   | 0           | 1   | 0            | 1    | Fgf14   | 0          | 0  | 0            | 0  |
| FGF16   | 0           | 0   | 0            | 0    | Fgf15   | 0          | 0  | 0            | 0  |
| FGF17   | 0           | 0   | 0            | 0    | Fgf16   | 0          | 0  | 0            | 0  |
| FGF18   | 1           | 1   | 2            | 1    | Fgf17   | 0          | 0  | 0            | 0  |
| FGF19   | 2           | 2   | 1            | 2    | Fgf18   | 0          | 1  | 0            | 1  |
| FGF20   | 1           | 2   | 1            | 1    | Fgf20   | 0          | 0  | 0            | 0  |
| FGF21   | 3           | 1   | 9            | 3    | Fgf21   | 0          | 0  | 0            | 0  |
| FGF22   | 1           | 0   | 1            | 1    | Fgf22   | 0          | 0  | 0            | 0  |
| FGF23   | 0           | 0   | 0            | 0    | Fgf23   | 0          | 0  | 0            | 0  |
| FGFR1   | 381         | 462 | 415          | 413  | Fgfr1   | 3          | 0  | 0            | 0  |
| FGFR2   | 4           | 1   | 2            | 0    | Fgfr2   | 0          | 3  | 0            | 1  |
| FGFR3   | 25          | 22  | 9            | 9    | Fgfr3   | 24         | 37 | 31           | 37 |
| FGFR4   | 49          | 63  | 24           | 22   | Fgfr4   | 0          | 1  | 0            | 0  |

**A**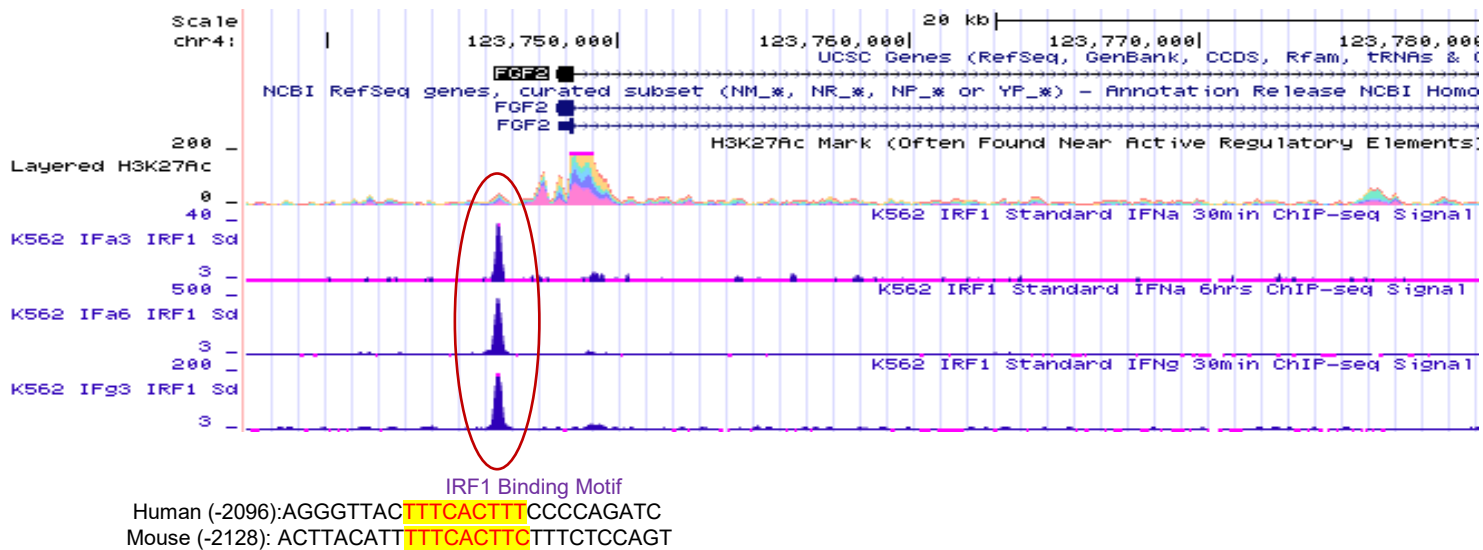**B**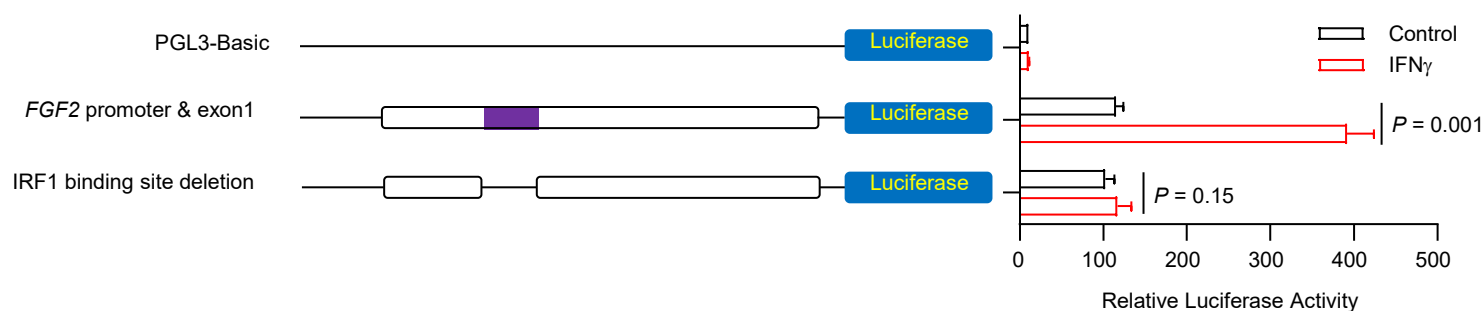**C**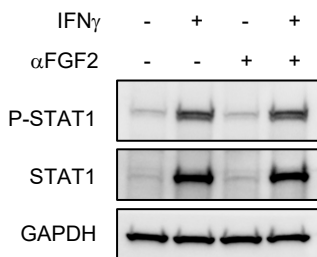**D**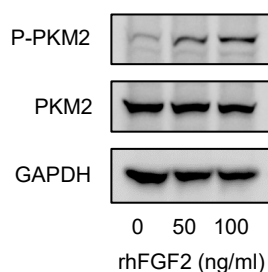**E**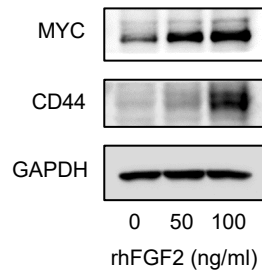**F**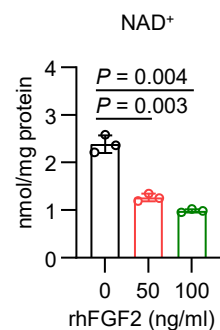**G**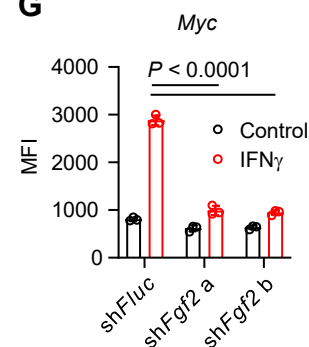**H**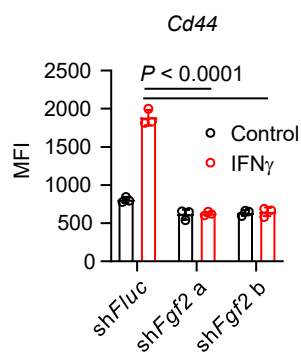**I**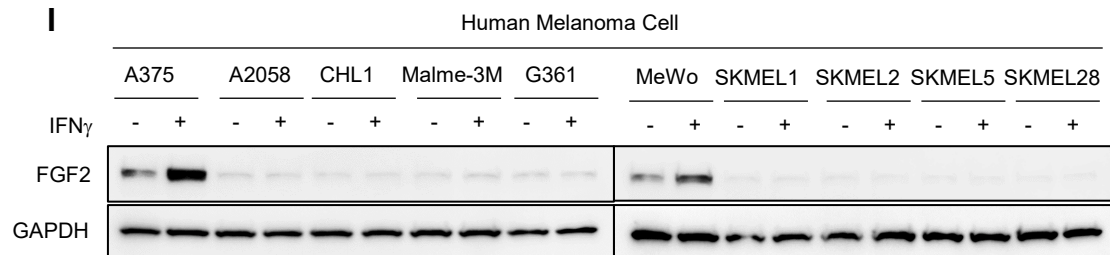**J**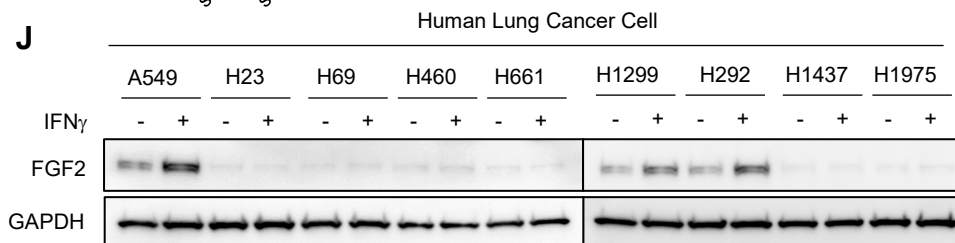**K**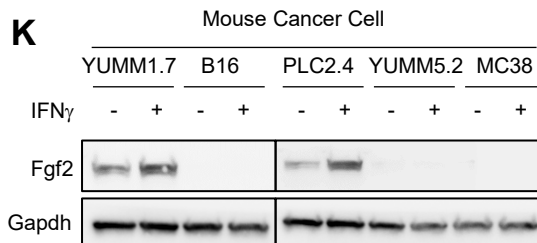

**Figure S6: IFN $\gamma$  induces FGF2 to control PKM2/ NAD<sup>+</sup>/  $\beta$ -catenin signaling. Related to Figure 6.**

**(A)** IRF1 ChIP-seq datasets in K562 cells were obtained from Encode at UCSC. IRF1 binding motif was found in the *FGF2* promoter in human and mouse.

**(B)** *FGF2* promoter and exon1 were inserted into PGL3-basic plasmid to generate a *FGF2* promoter reporter. IRF1 binding motif was deleted to generate a mutant reporter. A375 cells carrying *FGF2* promoter reporter or mutant reporter were treated with IFN $\gamma$  for 24 hours. Luciferase activity was determined by dual luciferase activity assay. Data are shown as mean  $\pm$  s.d., n = 3. Two-tailed t-test.

**(C)** A375 cells were treated with IFN $\gamma$ , in the presence or absence of FGF2 neutralizing antibody ( $\alpha$ FGF2). Phosphorylated (Y701) and total protein levels of STAT1 were determined at 24 hours by Western blot.

**(D-F)** A375 cells were treated with recombinant human FGF2. Phosphorylated PKM2 (**D**), MYC, and CD44 (**E**) were determined by Western blotting. 1 of 2 Western blots shown (**D**, **E**). NAD<sup>+</sup> levels were quantified by kit (**F**). Data are shown as mean  $\pm$  s.d., n = 3. Two-tailed t-test (**F**).

**(G-H)** sh*Fluc* or sh*Fgf2* YUMM1.7 cells were treated with IFN $\gamma$  for 48 hours. *Myc* (**G**) or *Cd44* (**H**) expression were determined by FACS. Data are shown as mean  $\pm$  s.d., n = 3. Two-tailed t-test.

**(I-K)** Human melanoma cells (**I**), human lung cancer cells (**J**), and mouse cancer cells (**K**) were treated with IFN $\gamma$  for 24 hours. FGF2 protein expression was determined by Western blot.

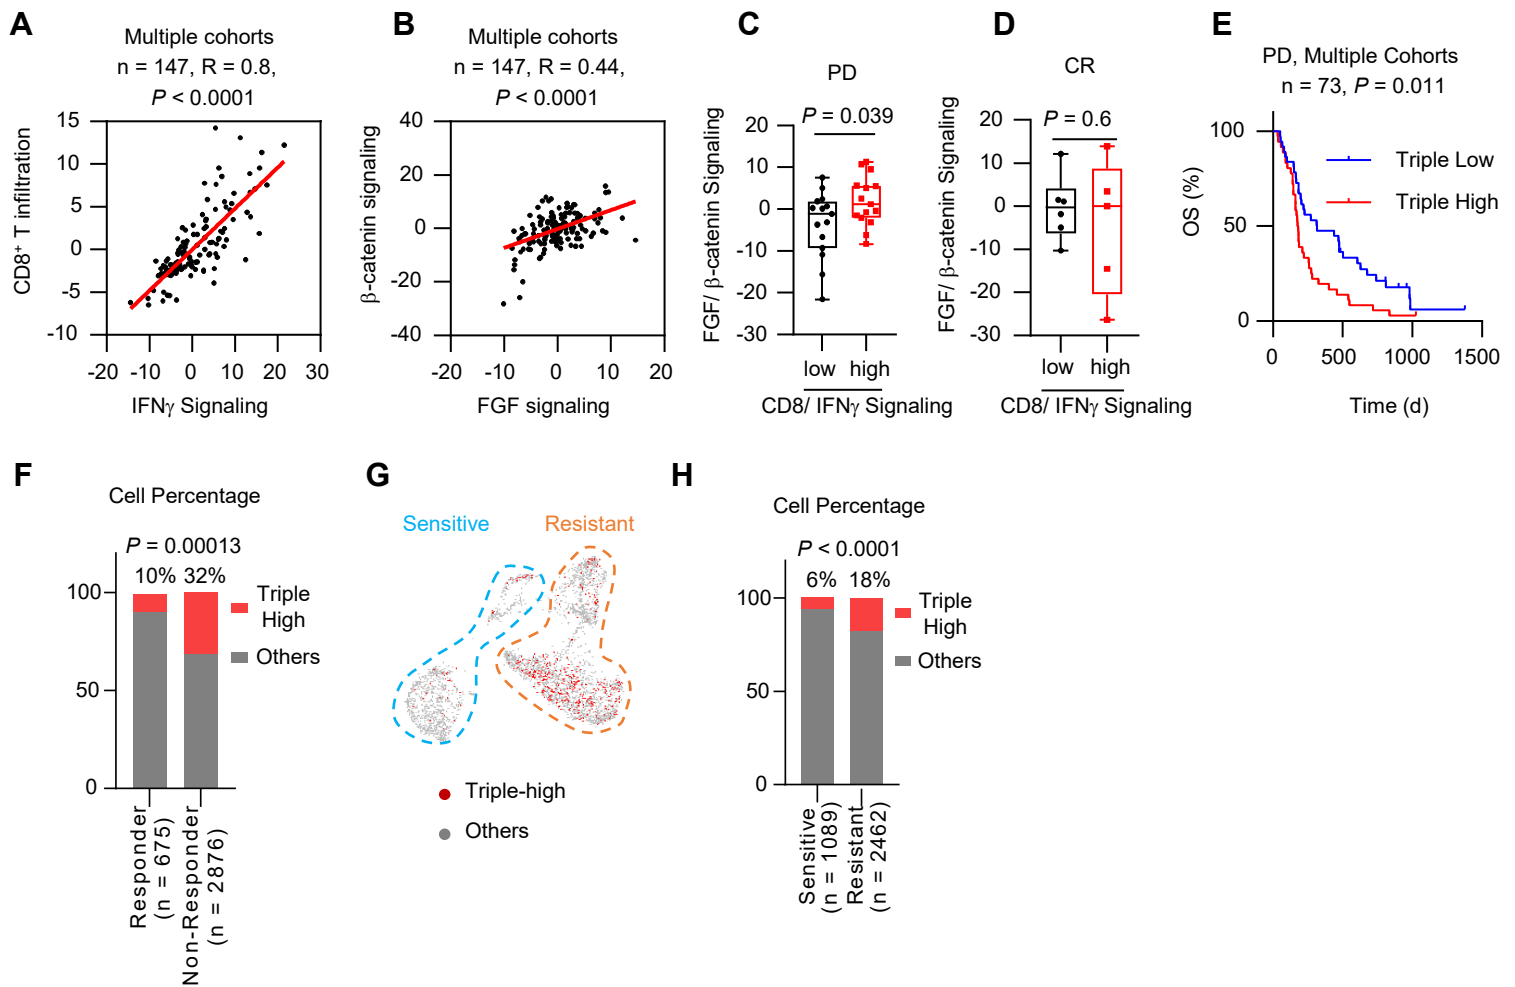

**Figure S7: Oncometabolic reprogramming drives cancer hyperprogression during immunotherapy. Related to Figure 6.**

**(A-B)** Correlation between CD8<sup>+</sup> T cell infiltration and IFN<sub>γ</sub> signaling **(A)**; and FGF signaling and β-catenin signaling **(B)** in 4 public cohorts combined. R and P values were determined by liner regression.

**(C-D)** Correlation between immunogenic and oncogenic signatures in PD **(C)** and CR **(D)** patients. Patients were divided into low and high CD8/ IFN<sub>γ</sub> signaling groups. The FGF/ β-catenin signaling levels were plotted. Two-tailed t-test.

**(E)** Overall survival of patients with PD on immunotherapy from multiple datasets stratified by median IFN<sub>γ</sub>/ FGF/ β-catenin gene signature scores (triple high vs triple low). HR = 0.55. Log-rank test.

**(F)** Percentages of tumor cells expressing triple high (IFN<sub>γ</sub>/ FGF/ β-catenin) gene signature in non-responders and responders to PD-1 therapy are shown. Chi-square test.

**(G-H)** Tumor cells have different sensitivities to anti-PD-1 therapy. Tumor cells expressing triple high (IFN<sub>γ</sub>/ FGF/ β-catenin) gene signatures are shown in red **(G)**. Percentages of tumor cells expressing triple high (IFN<sub>γ</sub>/ FGF/ β-catenin) gene signatures in ICB-resistant or -sensitive tumor cells are shown **(H)**. Chi-square test.

**Table S6: Target sequences for gene knock out or knock down. Related to STAR Methods.**

| <b>ID</b>     | <b>Target sequence</b> |
|---------------|------------------------|
| Ms Ifngr1 KO1 | ATTAGAACATTTCGTCGGTAC  |
| Ms Ifngr1 KO2 | CTTGAACCCTGTTCGTATGCT  |
| Hm IFNGR1 KO1 | GGTACTCCCAATATACGATA   |
| Hm IFNGR1 KO2 | GGTCCCTGTTTTTACCGTAG   |
| Ms Stat1 KO1  | GGTCGCAAACGAGACATCAT   |
| Ms Stat1 KO2  | CCAGTACAGCCGCTTTTCTC   |
| Hm STAT1 KO1  | GAGGTCATGAAAACGGATGG   |
| Hm STAT1 KO2  | ATTGATCATCCAGCTGTGAC   |
| Hm CTNNB1 KO1 | CTAACAGCCGCTTTTCTGTC   |
| Hm CTNNB1 KO2 | CAACAGTCTTACCTGGACTC   |
| Hm CTNNB1 KO3 | AGTCCTGTATGAGTGGGAAC   |
| shFluc        | CGCTGAGTACTTCGAAATGTC  |
| Hm shPKM2 1   | AACGCTTGTAGAACTCACTCT  |
| Hm shPKM2 2   | AAGAAGATCAACGCCTCACTG  |
| Hm shPKM2 3   | GAACACTCTGGGCTGTAAC    |
| Hm shPKM2 4   | CAACGCTTGTAGAACTCACTC  |
| Ms shPkm2 1   | AACGCTTGTAGTGCTCACTCT  |
| Ms shPkm2 2   | AACATGCAATAGAGACCAGCT  |
| Ms shPkm2 3   | GACTGGAAACCCTGACTTTAT  |
| Ms shFgf2 1   | AAGAGAGAGGAGTTGTGTCTA  |
| Ms shFgf2 2   | AACGAACTGGGCAGTATAAAC  |

**Table S7: Primers for molecular cloning, Related to STAR Methods.**

| <b>ID</b>               | <b>Primer sequence</b>                           |
|-------------------------|--------------------------------------------------|
| FGF2 promoter SacI<br>F | ATATGAGCTCGATGTTGAGCCCCTTGTCATGTG                |
| FGF2 promoter MluI<br>R | ATATACGCGTCGTTTTTGCAGTACAGCCGCTT                 |
| Ms FGF2 OE Sall F       | ATATGTCGACCATGGCTGCCAGCGGCATCAC                  |
| Ms FGF2 OE NotI R       | ATATGCGGCCGCTCAGCTCTTAGCAGACATTGGAAGAAACAGTATGGC |
| CTNNB1 K345R F          | GCAGAGTGCTGAGGGTGCTATCTGTCTGCTCTAG               |
| CTNNB1 K345R R          | ATAGCACCCCTCAGCACTCTGCTTGTGGTCCACAG              |

**Table S8: Primers for qPCR, Related to STAR Methods.**

| <b>ID</b>    | <b>Primer Sequence</b>   |
|--------------|--------------------------|
| Hm ACTB QF   | GAGCACAGAGCCTCGCCTTT     |
| Hm ACTB QR   | ACATGCCGGAGCCGTTGTC      |
| Hm GBP1 QF   | AGCCCTACAACCTTCGGAACAG   |
| Hm GBP1 QR   | TCTGGATTCGCCATCAGTCG     |
| Hm MYC QF    | TACAACACCCGAGCAAGGAC     |
| Hm MYC QR    | TTCTCCTCCTCGTCGCAGTA     |
| Hm CCND1 QF  | GATGCCAACCTCCTCAACGA     |
| Hm CCND1 QR  | GGAAGCGGTCCAGGTAGTTC     |
| Hm VEGFA QF  | CTTGCCTTGCTGCTCTACC      |
| Hm VEGFA QR  | CACACAGGATGGCTTGAAG      |
| Hm MMP14 QF  | AGTTCAGTGCCTACCGAAGAC    |
| Hm MMP14 QR  | TGTGTGTGGGTACGTAGGTC     |
| Hm PDL1 QF   | ACCTGGCTGCACTAATTGTCTA   |
| Hm PDL1 QR   | GGTGACTGGATCCACAACCAA    |
| Hm CD47 QF   | GCCTATATCCTCGCTGTGGTT    |
| Hm CD47 QR   | TTTGAATGCATTAAGGGGTTCC   |
| Hm FGF2 QF   | GCTGTACTGCAAAAACGGGG     |
| Hm FGF2 QR   | AGCCAGGTAACGGTTAGCAC     |
| Hm CD44 QF   | AAAACCTGCAGCCAACCTCCG    |
| Hm CD44 QR   | GAATACACCTGCAAAGCGGC     |
| Hm AXIN2 QF  | CAAACCTTCGCCAACCGTGGTTG  |
| Hm AXIN2 QR  | GGTGCAAAGACATAGCCAGAACC  |
| Hm CCND2 QF  | GAGAAGCTGTCTCTGATCCGCA   |
| Hm CCND2 QR  | CTTCCAGTTGCGATCATCGACG   |
| Hm NKD1 QF   | GAAGATGGAGAGAGTGAGCGAAC  |
| Hm NKD1 QR   | GTCATACAGGGTGAAGGTCCAC   |
| Hm RNF43 QF  | GGTTACATCAGCATCGGACTTGC  |
| Hm RNF43 QR  | ATGCTGGCGAATGAGGTGGAGT   |
| Hm NOTUM QF  | CTACTGGTGGAACGCAAACATGG  |
| Hm NOTUM QR  | CGCACCACCTCCTGGATGATG    |
| Hm LEF1 QF   | CTACCCATCCTCACTGTCAGTC   |
| Hm LEF1 QR   | GGATGTTCCCTGTTTGACCTGAGG |
| Hm ANKRD1 QF | CCTGTGGATGTGCCTACGTT     |
| Hm ANKRD1 QR | ACAGGCGATAAGATGCTCCG     |
| Hm CTGF QF   | GAGCAGCTGCAAGTACCAGT     |
| Hm CTGF QR   | GTCTTCCAGTCGGTAAGCCG     |
| Hm HEY1 QF   | GGCTGGTACCCAGTGCTTTT     |
| Hm HEY1 QR   | CCCGAAATCCCAAACCTCCGA    |
| Hm HES1 QF   | GCCAGTGTCAACACGACACC     |
| Hm HES1 QR   | CCTCGTTCATGCACTCGCTG     |
| Hm PTCH1 QF  | TCGCTCTGGAGCAGATTTCC     |
| Hm PTCH1 QR  | TCTCGAGGTTGCTGCTTTT      |
| Hm GLI1 QF   | CGGCACCCCTTCTCTTGCT      |
| Hm GLI1 QR   | CATCGAGTTGAACATGGCGTC    |
| Ms Actb QF   | CACTGTGAGTCGCGTCCA       |
| Ms Actb QR   | GACCCATTCCCACCATCACA     |

|               |                          |
|---------------|--------------------------|
| Ms Myc QF     | GTACCTCGTCCGATTCCACG     |
| Ms Myc QR     | GCACCTCTTGAGGACCAGTG     |
| Ms Ccnd1 QF   | TCAAGTGTGACCCGGACTG      |
| Ms Ccnd1 QR   | CACTACTTGGTGGCTCCCG      |
| Ms Fgf2 QF    | AAGCGGCTCTACTGCAAGAA     |
| Ms Fgf2 QR    | ACACTTAGAAGCCAGCAGCC     |
| Ms Cd44 QF    | TGAGACCTGCAGGTATGGGT     |
| Ms Cd44 QR    | GCTGAAGCATTGAAGCAATA     |
| Ms Cdh1 QF    | GGTCATCAGTGTGCTCACCTCT   |
| Ms Cdh1 QR    | GCTGTTGTGCTCAAGCCTTCAC   |
| Ms Nanog QF   | GAACGCCTCATCAATGCCTGCA   |
| Ms Nanog QR   | GAATCAGGGCTGCCTTGAAGAG   |
| Ms Aldh1a1 QF | GGAATACCGTGGTTGTCAAGCC   |
| Ms Aldh1a1 QR | CCAGGGACAATGTTTACCACGC   |
| Ms Sox2 QF    | AACGGCAGCTACAGCATGATGC   |
| Ms Sox2 QR    | CGAGCTGGTCATGGAGTTGTAC   |
| Ms Klf4 QF    | CTATGCAGGCTGTGGCAAACC    |
| Ms Klf4 QR    | TTGCGGTAGTGCCTGGTCAGTT   |
| Ms Bmi1 QF    | ACTACACGCTAATGGACATTGCC  |
| Ms Bmi1 QR    | CTCTCCAGCATTTCGTCAGTCCA  |
| Ms Vim QF     | CGGAAAGTGGAAATCCTTGCAGG  |
| Ms Vim QR     | AGCAGTGAGGTCAGGCTTGGAA   |
| Ms Zeb1 QF    | ATTCAGCTACTGTGAGCCCTGC   |
| Ms Zeb1 QR    | CATTCTGGTCCTCCACAGTGGA   |
| Ms Fn1 QF     | CCCTATCTCTGATACCGTTGTCC  |
| Ms Fn1 QR     | TGCCGCAACTACTGTGATTCCG   |
| Ms Tjp1 QF    | GTTGGTACGGTGCCCTGAAAGA   |
| Ms Tjp1 QR    | GCTGACAGGTAGGACAGACGAT   |
| Ms Snai1 QF   | TGTCTGCACGACCTGTGGAAAG   |
| Ms Snai1 QR   | CTTCACATCCGAGTGGGTTTGG   |
| Ms Snai2 QF   | TCTGTGGCAAGGCTTTCTCCAG   |
| Ms Snai2 QR   | TGCAGATGTGCCCTCAGGTTTG   |
| Ms Twist1 QF  | GATTCAGACCCTCAAACCTGGCG  |
| Ms Twist1 QR  | AGACGGAGAAGGCGTAGCTGAG   |
| Ms Pcn1 QF    | CAAGTGGAGAGCTTGGCAATGG   |
| Ms Pcn1 QR    | GCAAACGTTAGGTGAACAGGCTC  |
| Ms Mki67 QF   | GAGGAGAAACGCCAACCAAGAG   |
| Ms Mki67 QR   | TTTGTCCCTCGGTGGCGTTATCC  |
| Ms Cdk1 QF    | CATGGACCTCAAGAAGTACCTGG  |
| Ms Cdk1 QR    | CAAGTCTCTGTGAAGAACTCGCC  |
| Ms Cdk2 QF    | TCATGGATGCCTCTGCTCTCAC   |
| Ms Cdk2 QR    | TGAAGGACACGGTGAGAATGGC   |
| Ms Cdk4 QF    | CATACCTGGACAAAGCACCTCC   |
| Ms Cdk4 QR    | GAATGTTCTCTGGCTTCAGGTCC  |
| Ms Cdk6 QF    | ACCTCTGGAGTGTGGTTGCAT    |
| Ms Cdk6 QR    | TTCCTCTCCTGGGAGTCCAATG   |
| Ms Cdk7 QF    | TGAGAATGGAGTTCTGAAACTGGC |
| Ms Cdk7 QR    | CCACACCATACATCCTAGCTCC   |
| Ms Ccna2 QF   | TTGTAGGCACGGCTGCTATGCT   |
| Ms Ccna2 QR   | GGTGCTCCATTCTCAGAACCTG   |



|             |                         |
|-------------|-------------------------|
| Ms Ccnb1 QF | AGAGGTGGA ACTTGCTGAGCCT |
| Ms Ccnb1 QR | GCACATCCAGATGTTTCCATCGG |
| Ms Ccne1 QF | AAGCCCTCTGACCATTGTGTCC  |
| Ms Ccne1 QR | CTAAGCAGCCAACATCCAGGAC  |
